# Supplementary material
Source: PubMed Central journal article supplement (PMC3234831)

### Supplemental Figure Legends

Supplemental Figure 1. A second shRNA construct targeting PKC $\alpha$  also inhibits wound healing. A. NT (open circles) or PKC $\alpha$  shRNA #2-expressing (filled circles) cell lines derived from H1703 NSCLC cells were subjected to a wound healing assay as described for Figure 3. Results reflect the means $\pm$ SEM of three experiments. B. Western blot showing PKC $\alpha$  knockdown efficiency for a representative experiment as in (A). \*, significantly different from NT shRNA-expressing cells,  $p < 0.05$ .

Supplemental Figure 2. A second siRNA targeting DLG1 also inhibits wound healing. A. H1703 cells transfected with a negative control siRNA (ctrl siRNA, open circles) or siRNA targeting DLG1 (DLG1 #2 siRNA, filled circles) were re-plated and subjected to a wound healing assay as described for Figure 3. Results were normalized to the values for the control cells and reflect the means $\pm$ SEM of 8 experiments. B. Western blot showing DLG1 knockdown efficiency for a representative experiment as in (A). \*\*\*, significantly different from control cells,  $p < 0.001$ .

Supplemental Figure 1

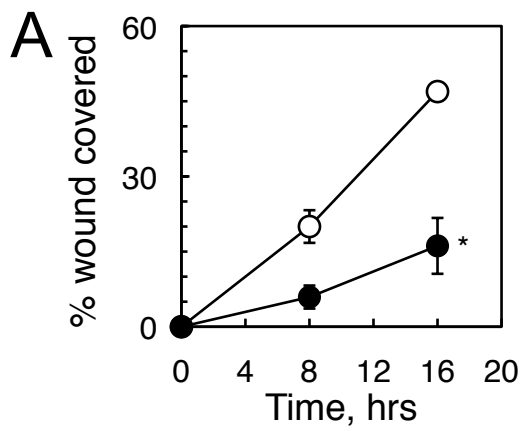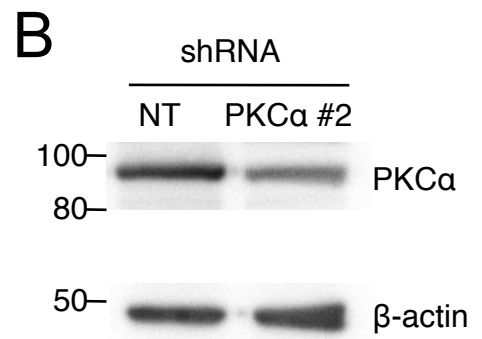

Supplemental Figure 2

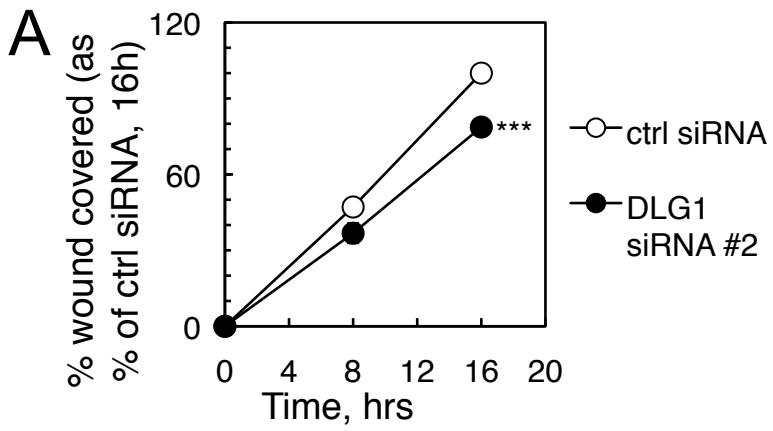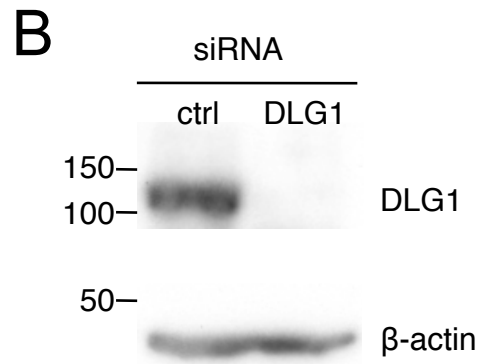

Supplement: supp_M111.294603_jbc.M111.294603-1.pdf [file supp_M111.294603_jbc.M111.294603-1.pdf]
